# Supplementary material for: A Phylogenetic Approach to Structural Variation in Organization of Nuclear Group I Introns and Their Ribozymes
Source: MDPI journal article supplement (doi:10.3390/ncrna7030043), 2021-07-22
Supplement: s1 [file s1]

**Table S1.** Key features of 72 myxomycete S1389 group I introns included in this work.

| Host species                           | Acc No   | Isolate  | Size <sup>1</sup> | Insert <sup>2</sup> | P5d <sup>3</sup> | P7 <sup>4</sup> |
|----------------------------------------|----------|----------|-------------------|---------------------|------------------|-----------------|
| <b>Order Physarales</b>                |          |          |                   |                     |                  |                 |
| <i>Diderma fallax</i> <sup>5</sup>     | MZ313547 | It-K52   | 532 bp            | -                   | -                | A1              |
| <i>D. globosum</i>                     | DQ903677 | AMFD110  | 722 bp            | -                   | -                | A1              |
| <i>D. meyeræ</i>                       | HE614614 | It-K61   | 735 bp            | -                   | -                | A2              |
| <i>D. meyeræ</i> <sup>5</sup>          | MZ313546 | It-K68   | 921 bp            | -                   | -                | A2              |
| <i>D. niveum</i> <sup>5</sup>          | MZ313548 | Fr-M26   | 749 bp            | -                   | -                | A1              |
| <i>D. niveum</i>                       | AM231291 | Fr-K10   | 682 bp            | -                   | -                | A1              |
| <i>D. niveum</i>                       | HE614616 | It-K66   | 683 bp            | -                   | -                | A1              |
| <i>D. niveum</i>                       | HE614617 | Uk-K79   | 683 bp            | -                   | -                | A1              |
| <i>D. saundersii</i> <sup>5</sup>      | MZ313549 | Mx-K30   | 532 bp            | -                   | -                | A1              |
| <i>D. testeceum</i>                    | AM231292 | Pr3-1    | 529 bp            | -                   | -                | G1              |
| <i>Didymium iridis</i>                 | AJ938151 | CR19-1   | 523 bp            | -                   | -                | A1              |
| <i>D. iridis</i>                       | AJ938150 | CUR1-4   | 637 bp            | -                   | -                | A1              |
| <i>D. nigripes</i>                     | AF239230 | -        | 654 bp            | -                   | -                | A1              |
| <i>D. squamulosum</i>                  | AM231293 | CR10     | 792 bp            | -                   | -                | U1              |
| <i>Fuligo leviderma</i>                | DQ903676 | AMFD130  | 517 bp            | -                   | -                | A1              |
| <i>Lepidoderma carestianum</i>         | HE614618 | It-K71   | 393 bp            | -                   | -                | A2              |
| <i>L. crustaceum</i>                   | HE614619 | It-K62   | 396 bp            | -                   | -                | A2              |
| <i>L. peyerimhoffii</i> <sup>5</sup>   | MZ313552 | It-K63   | 388 bp            | -                   | +                | A2              |
| <i>L. tigrinum</i>                     | DQ903678 | AMFD192  | 785 bp            | -                   | -                | A1              |
| <i>Mucilago crustacea</i> <sup>5</sup> | MZ313554 | No-K94   | 1274 bp           | DR-P9               | -                | A1              |
| <b>Order Stemonitales</b>              |          |          |                   |                     |                  |                 |
| <i>Brefeldia maxima</i>                | JQ031957 | MM24519  | 1304 bp           | HEG-P1              | +                | A3              |
| <i>Colloderma oculatum</i>             | JQ031959 | HS2885   | 421 bp            | -                   | +                | A3              |
| <i>C. robustum</i>                     | JQ031960 | AMFD270  | 384 bp            | -                   | +                | A1              |
| <i>Comatricha nigra</i>                | DQ903683 | AMFD155  | 788 bp            | -                   | +                | A1              |
| <i>C. pseudoalpina</i>                 | DQ903673 | MM23892  | 815 bp            | -                   | +                | U1              |
| <i>Diacheopsis pauxilla</i>            | JQ031966 | MM29883  | 628 bp            | -                   | -                | A1              |
| <i>Diachea subsessilis</i>             | JQ031964 | MM24463  | 919 bp            | -                   | -                | U1              |
| <i>Lamproderma aeneum</i>              | JQ031969 | MM36255  | 545 bp            | -                   | -                | A3              |
| <i>L. arcyrrioides</i>                 | JQ031973 | MM37005  | 1006 bp           | DR-P9               | +                | A2              |
| <i>L. cacographicum</i>                | JQ031976 | AMFD310  | 957 bp            | DR-P9               | -                | A1              |
| <i>L. columbinum</i>                   | HQ687204 | F2       | 503 bp            | -                   | -                | A2              |
| <i>L. columbinum</i>                   | HQ687196 | 106      | 563 bp            | -                   | -                | U2              |
| <i>L. columbinum</i>                   | HQ687197 | 63b      | 474 bp            | -                   | -                | A2              |
| <i>L. columbinum</i>                   | HQ687200 | 132      | 480 bp            | -                   | +                | A3              |
| <i>L. disseminatum</i>                 | JQ031978 | AMFD38   | 498 bp            | -                   | -                | A1              |
| <i>L. echinosporum</i>                 | JQ031980 | AMFD136  | 486 bp            | -                   | +                | A3              |
| <i>L. echinosporum</i>                 | JQ031979 | AK06016  | 481 bp            | -                   | +                | A3              |
| <i>L. pseudomaculatum</i>              | JQ031985 | MM37354  | 411 bp            | -                   | -                | A3              |
| <i>L. puncticulatum</i>                | HQ687194 | 172      | 514 bp            | -                   | +                | A2              |
| <i>L. puncticulatum</i>                | HQ687202 | 162      | 511 bp            | -                   | +                | A1              |
| <i>L. puncticulatum</i>                | HQ687195 | 3        | 517 bp            | -                   | +                | A1              |
| <i>L. sauteri</i>                      | DQ903674 | AMFD208  | 543 bp            | -                   | +                | A1              |
| <i>L. zonatum</i>                      | DQ903672 | MM21644  | 434 bp            | -                   | -                | A1              |
| <i>Meriderma carestiae</i>             | JQ031999 | MM35985  | 566 bp            | -                   | -                | A1              |
| <i>M. carestiae</i>                    | DQ903671 | AMFD173  | 566 bp            | -                   | -                | A1              |
| <i>M. cribrarioides</i>                | JQ032000 | MM37106  | 538 bp            | -                   | -                | A1              |
| <b>Order Liceales</b>                  |          |          |                   |                     |                  |                 |
| <i>Licea marginata</i>                 | JX481296 | DWM7368  | 455 bp            | -                   | +                | A3              |
| <b>Order Trichiales</b>                |          |          |                   |                     |                  |                 |
| <i>Calomyxa metallica</i>              | JX481284 | AMFD483  | 532 bp            | -                   | -                | A3              |
| <i>Trichia varia</i>                   | KM494993 | sc22370  | 1531 bp           | HEG-P1              | -                | A3              |
| <i>T. varia</i>                        | KM494994 | LE259268 | 586 bp            | -                   | -                | A3              |
| <i>T. varia</i>                        | KM494995 | LE259461 | 586 bp            | -                   | -                | A3              |
| <i>T. varia</i>                        | KM494996 | JVR848   | 1531 bp           | HEG-P1              | -                | A3              |
| <i>T. varia</i>                        | KM494997 | sc22386  | 559 bp            | -                   | -                | A1              |
| <i>T. varia</i>                        | KM494998 | sc22408  | 559 bp            | -                   | -                | A1              |
| <i>T. varia</i>                        | KM494999 | sc22409  | 559 bp            | -                   | -                | A1              |
| <i>T. varia</i>                        | KM495003 | sc22442  | 559 bp            | -                   | -                | A1              |
| <i>T. varia</i>                        | KM495005 | sc22517  | 559 bp            | -                   | -                | A1              |
| <i>T. varia</i>                        | KM495006 | sc27697  | 559 bp            | -                   | -                | A1              |

|                 |          |             |         |        |   |    |
|-----------------|----------|-------------|---------|--------|---|----|
| <i>T. varia</i> | KM495009 | sc27742     | 559 bp  | -      | - | A1 |
| <i>T. varia</i> | KM495010 | sc27839     | 559 bp  | -      | - | A1 |
| <i>T. varia</i> | KM495018 | KRAM M-1585 | 559 bp  | -      | - | A1 |
| <i>T. varia</i> | KM495019 | sc27686     | 559 bp  | -      | - | A1 |
| <i>T. varia</i> | KM495020 | sc27737     | 559 bp  | -      | - | A1 |
| <i>T. varia</i> | KM495021 | sc27850c1   | 559 bp  | -      | - | A1 |
| <i>T. varia</i> | KM495022 | sc27860c4   | 559 bp  | -      | - | A1 |
| <i>T. varia</i> | KM495023 | sc27507     | 559 bp  | -      | - | A1 |
| <i>T. varia</i> | KM495024 | sc27648c1   | 559 bp  | -      | - | A1 |
| <i>T. varia</i> | KM495026 | sc27667c1   | 559 bp  | -      | - | A1 |
| <i>T. varia</i> | KM495027 | sc27667c2   | 559 bp  | -      | - | A1 |
| <i>T. varia</i> | KM495028 | sc27772c2   | 559 bp  | -      | - | A1 |
| <i>T. varia</i> | KM495029 | sc27850c2   | 559 bp  | -      | - | A1 |
| <i>T. varia</i> | KM495030 | LE254838    | 1544 bp | HEG-P1 | - | A1 |

| Host species | Acc No | Isolate | Size | Insert | P5d | P7 |
|--------------|--------|---------|------|--------|-----|----|
|--------------|--------|---------|------|--------|-----|----|

Notes:

<sup>1</sup>Size in base pairs of the S1389 group I intron insertion.

<sup>2</sup>Type of large insertions in group I ribozyme paired segment P1 or P9. HEG, homing endonuclease gene; DR, direct repeat motifs.

<sup>3</sup>Presence or absence of the optional paired segment P5d.

<sup>4</sup>G-binding sequence variants in segment P7, as indicated in Figure 3.

<sup>5</sup>This work.

a

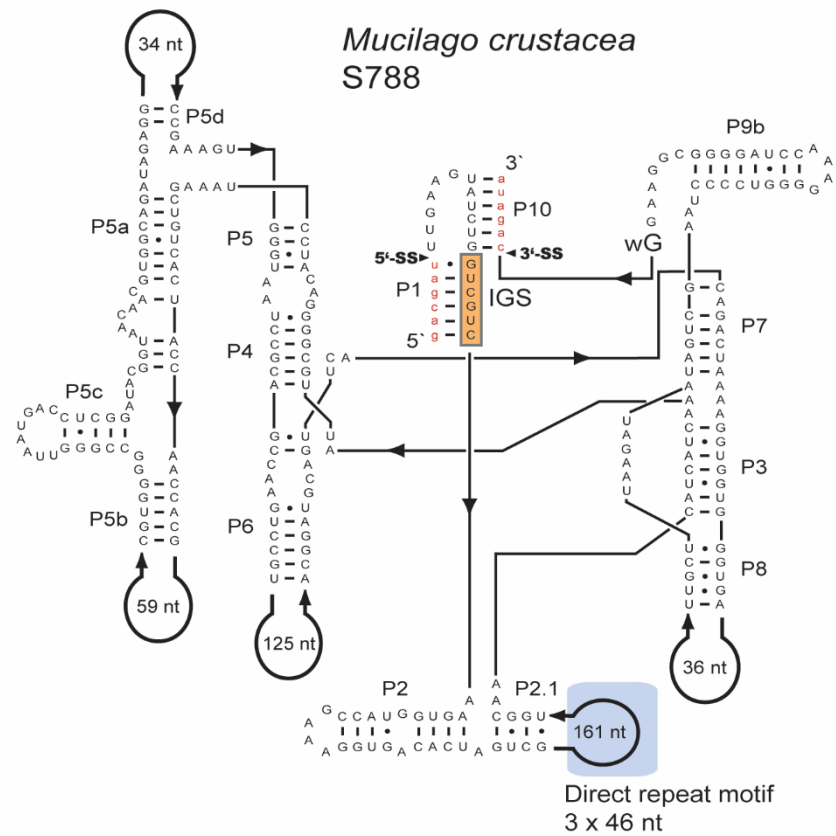

b

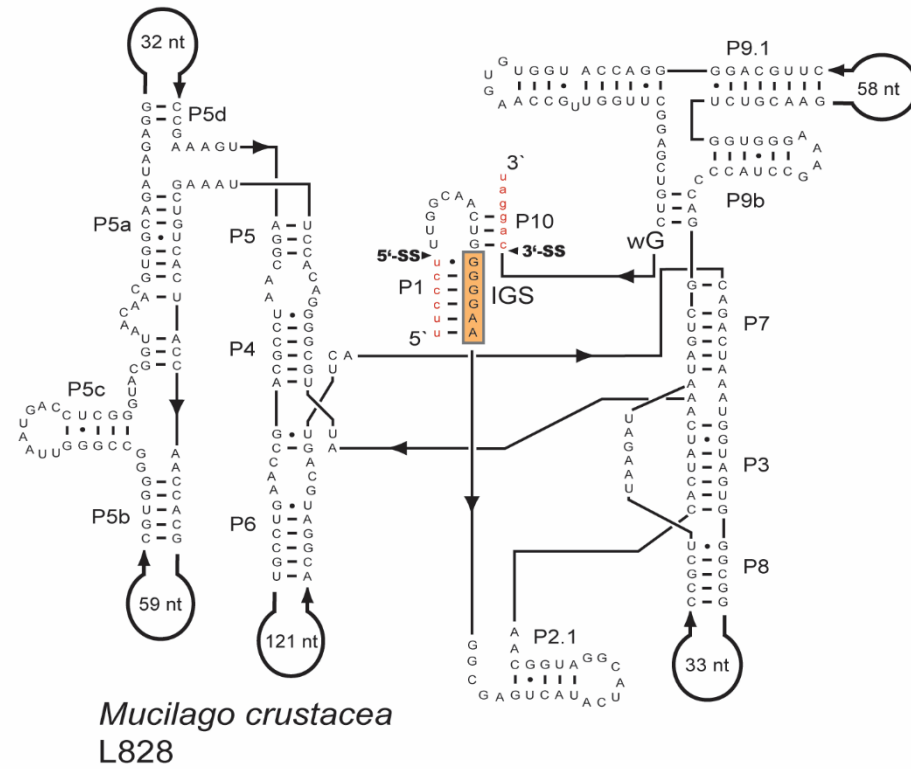

Figure S1 (a&b)

C

*Mucilago crustacea*  
L1926

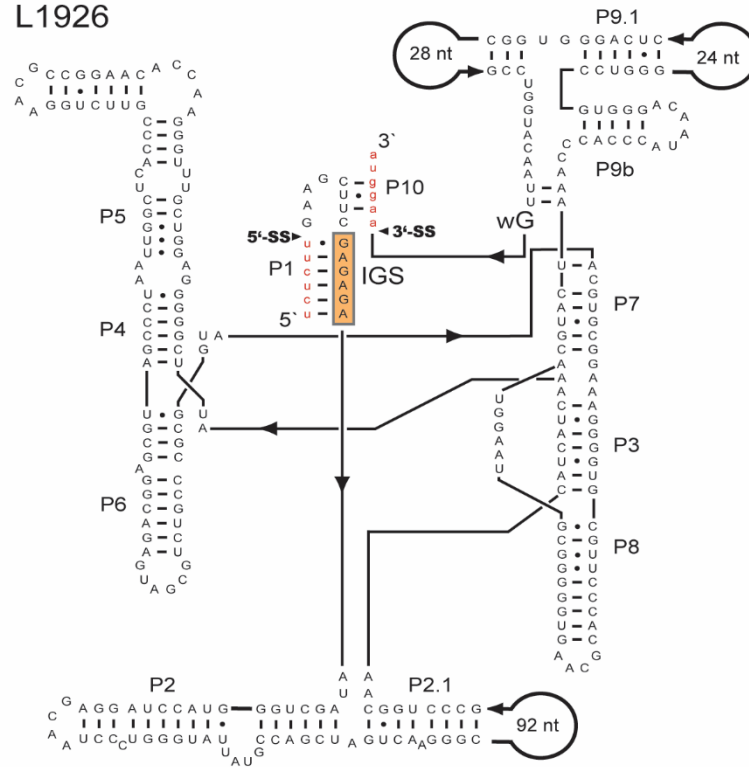

d

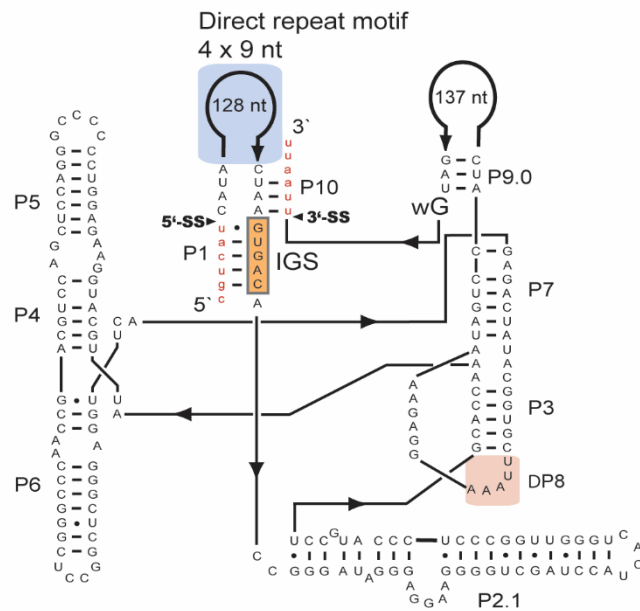

*Mucilago crustacea*  
L1949

Figure S1 (c&d)

e

*Mucilago crustacea*  
L2066

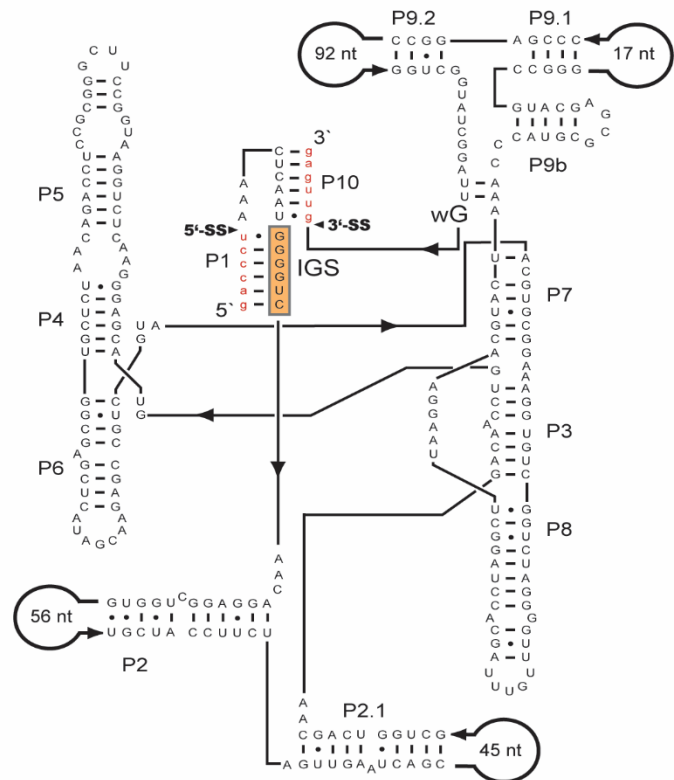

f

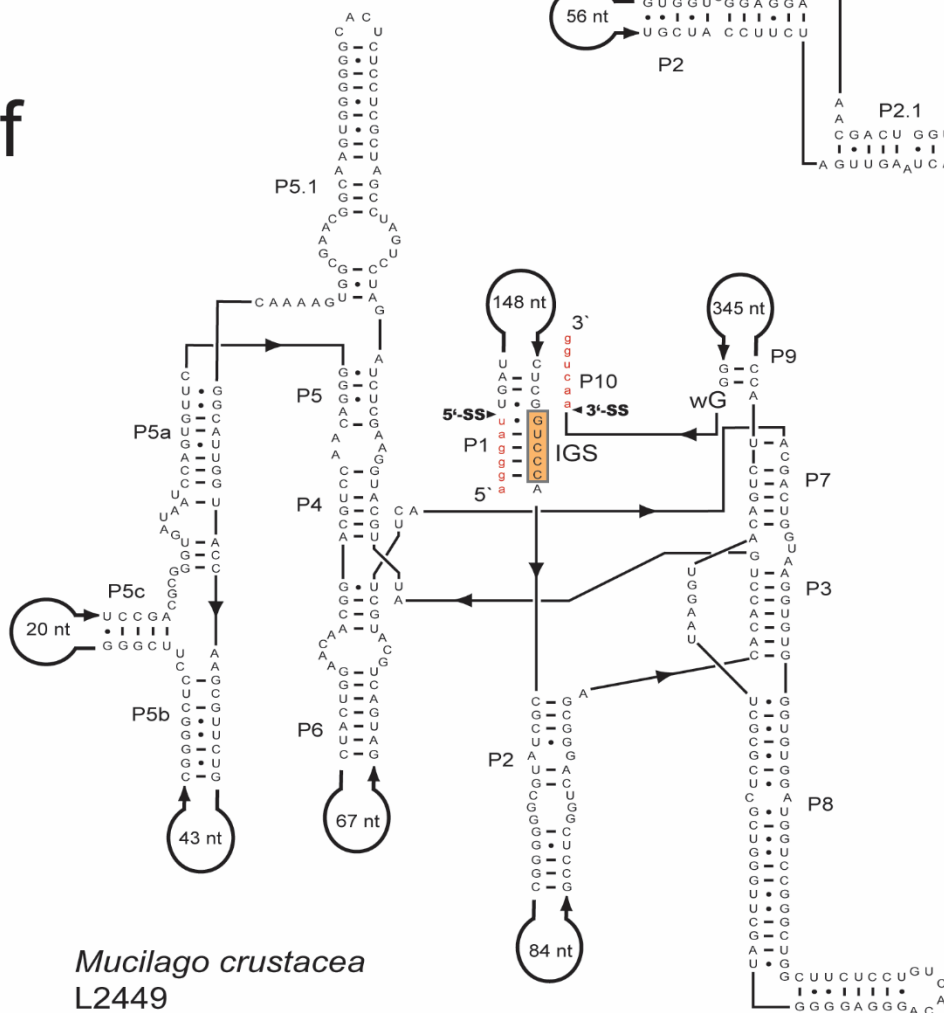

*Mucilago crustacea*  
L2449

Figure S1 (e&f)

**Figure S1:** Secondary structure diagrams of the *Mucilago crustacea* rDNA group I introns. (a) S788 is a group IC1 intron in the SSU rRNA gene. Note that segment P2.1 (blue box) contains a 46-nt direct repeat motif. (b) L828 is a group IC1 intron in

the LSU rRNA gene. (c) L1926 is a group IE intron in the LSU rRNA gene. (d) L1949 is an unclassified group I intron in the LSU rRNA gene. Note that the P8 segment of the catalytic core is missing (pink box), and that segment P1 (blue box) contains a 9-nt direct repeat motif. (e) L2066 is a group IE intron in the LSU rRNA gene. (f) L2449 is a group IC1 intron in the LSU rRNA gene. Note that P1 and P9 contain extension sequences, but with no reading frame or direct repeat features. Common note to all intron diagrams: P1-P10, paired RNA segments; 5' SS and 3'SS, exon-intron splice sites; IGS, internal guide sequence; ωG, last nucleotide residue of intron; red lowercase letters, exon sequences.

[illegible]

**Figure S2:** Sequence alignment of core structure nucleotides of myxomycete S1389 group I intron. Dashes correspond to deleted positions. Secondary structure paired segments (P1-P8) are shown above the alignment. Intron sequences are indicated by GenBank accession numbers. V01416 and MZ313554\* correspond to the out-group *Tetrahymena* intron Tth.L1925 and *Mucilago* intron Mcr.S788, respectively.



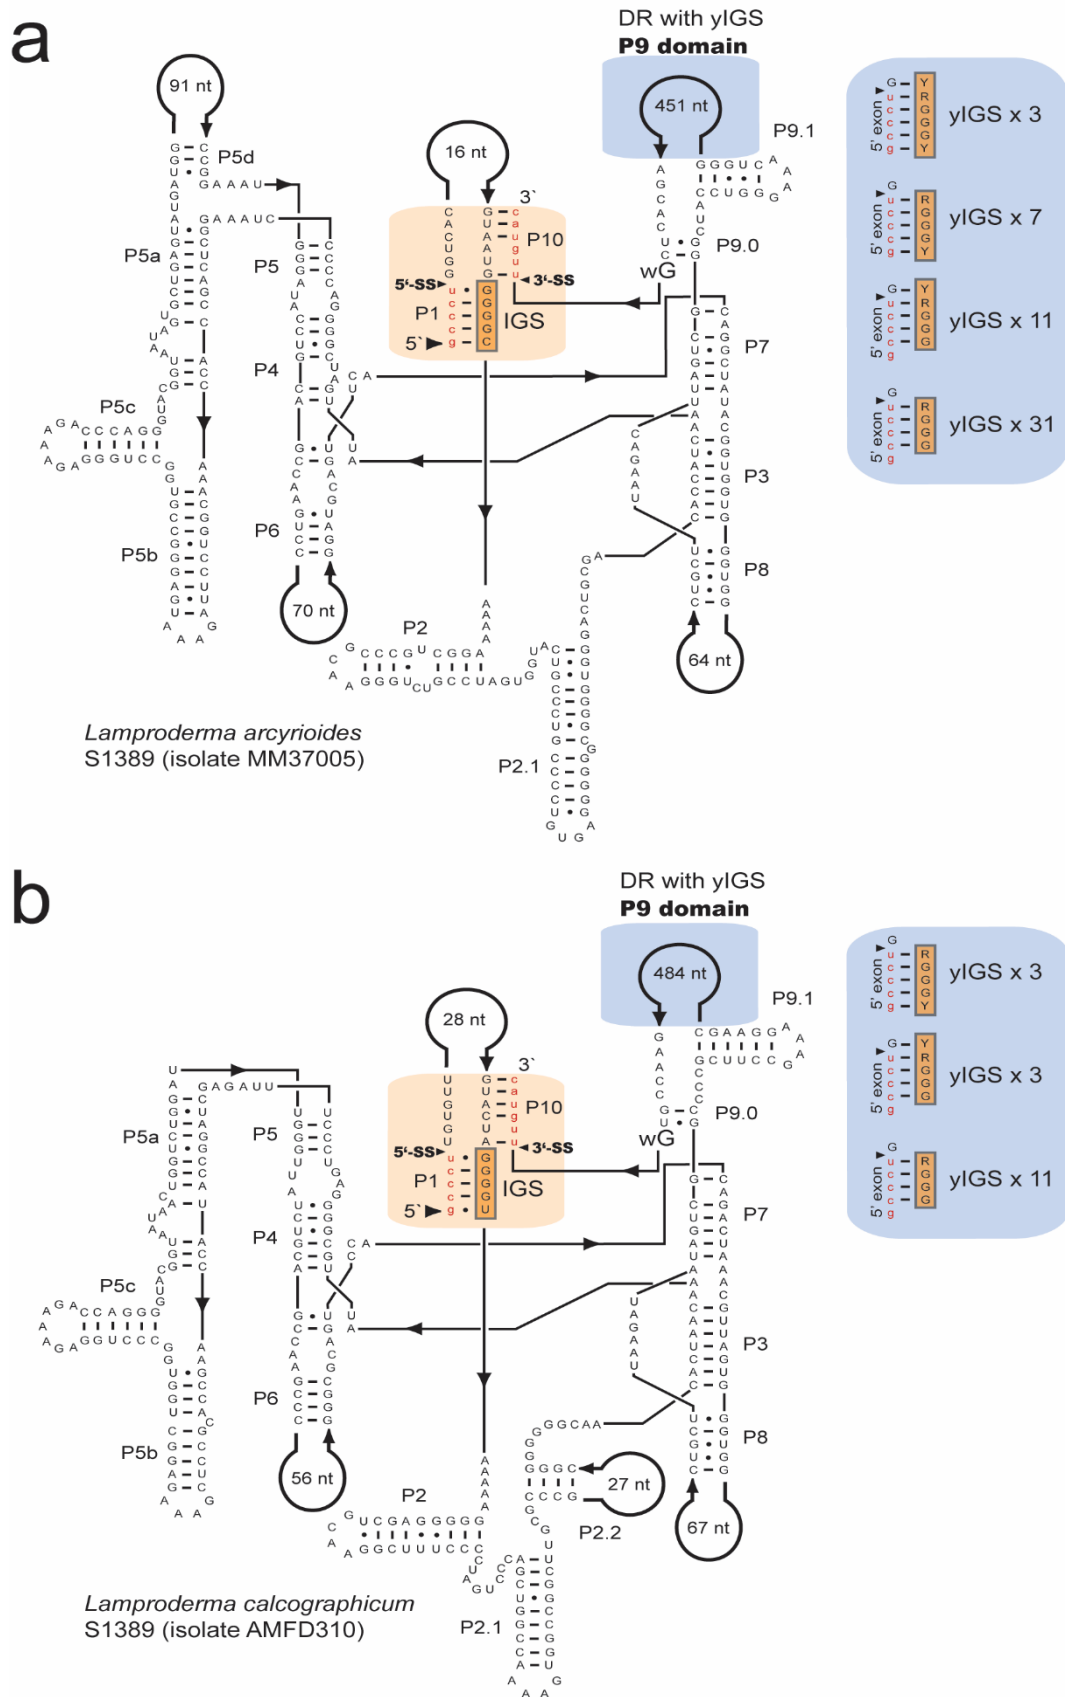

Figure S3

**Figure S3:** Secondary structure diagrams of (a) *Lamproderma arcyrrioides* and (b) *Lamproderma arcyrrioides* S1389 group I intron. P1-P10, paired RNA segments; 5' SS and 3' SS, exon-intron splice sites; IGS, internal guide sequence. The introns contain large extensions in P9 that contains direct repeat motifs (blue box) with ΨIGS sequences motifs.



diagram of *T. varia* group I introns (KM494996 and KM495030). Homing endonuclease gene (HEG) insertions are located in segment P1. P1-P10, paired RNA segments; 5' SS and 3'SS, exon-intron splice sites; IGS, internal guide sequence; ωG, last nucleotide residue of intron; red lowercase letters, exon sequences; black lowercase letters, nucleotide positions only present in one of the introns. R represents A or G (purine); Y represents C or U (pyrimidine); K represents G or U; M represents A or C; S represents C or G; W represents A or U.

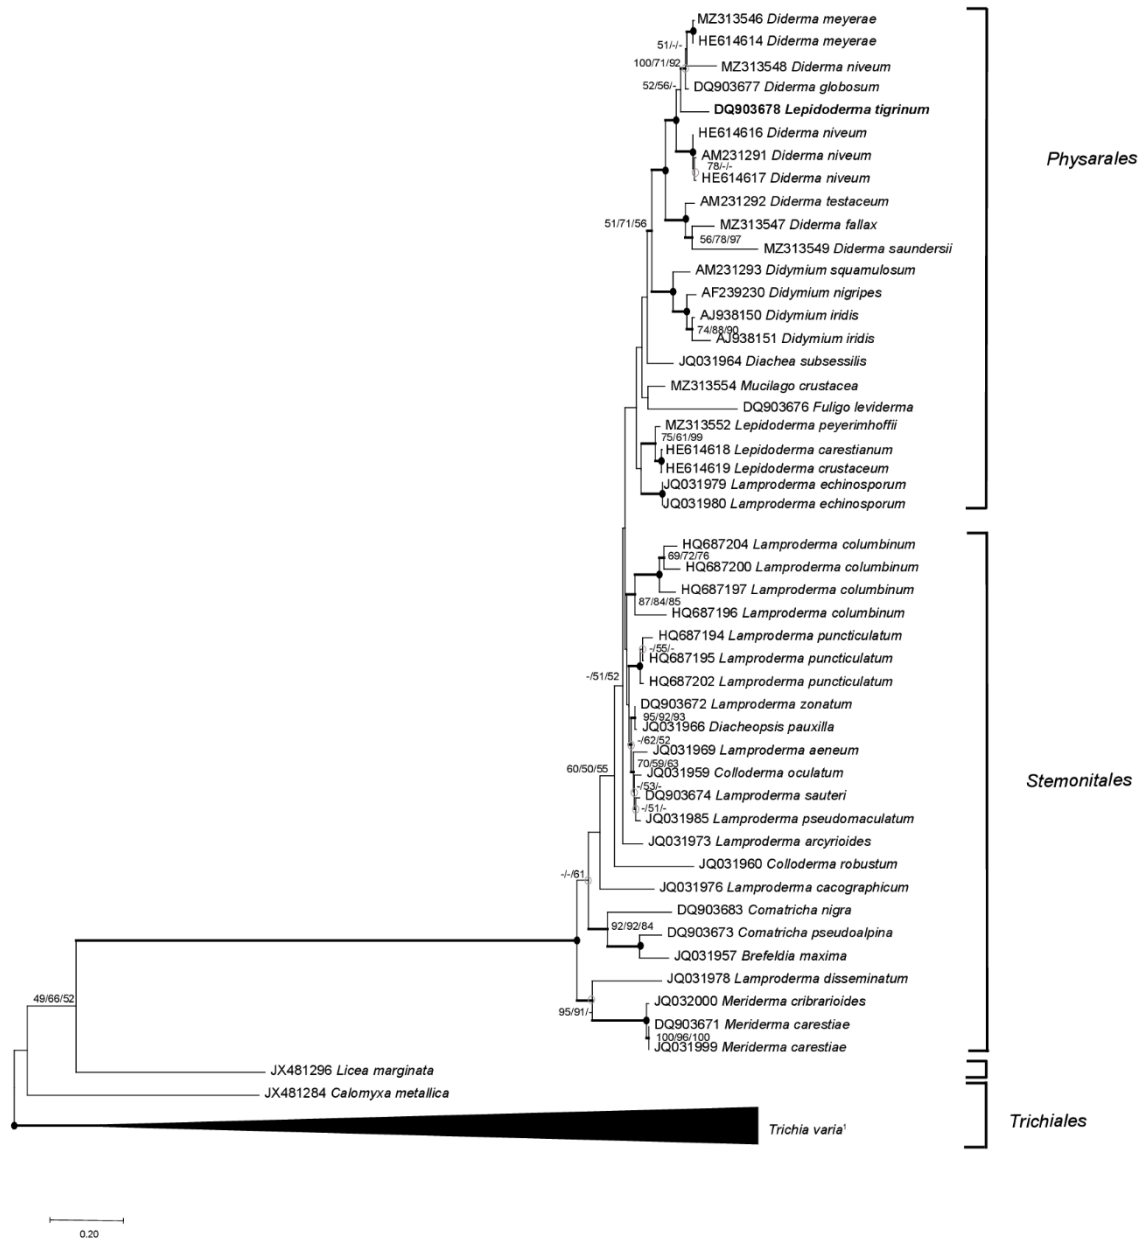

**Figure S5:** Molecular phylogeny of myxomycete taxa based SSU rDNA sequences. The SSU topology is obtained by neighbor-joining (NJ) analysis of 72 taxa and 1,575 nt aligned positions (SSU dataset 1; Table S1). The tree is rooted with the *T. varia* SSU rDNA sequence. The NJ, maximum likelihood (ML), and maximum parsimony (MP) bootstrap replicates ( $\geq 50\%$ ) are given at each node. Bayesian posterior (BI) probabilities ( $\geq 0.95$ ) are shown in bold branches. Black dots at branch points; maximum support in NJ, ML, and MP ( $\geq 97\%$ ). The scale bar indicates the fraction of substitutions per site.

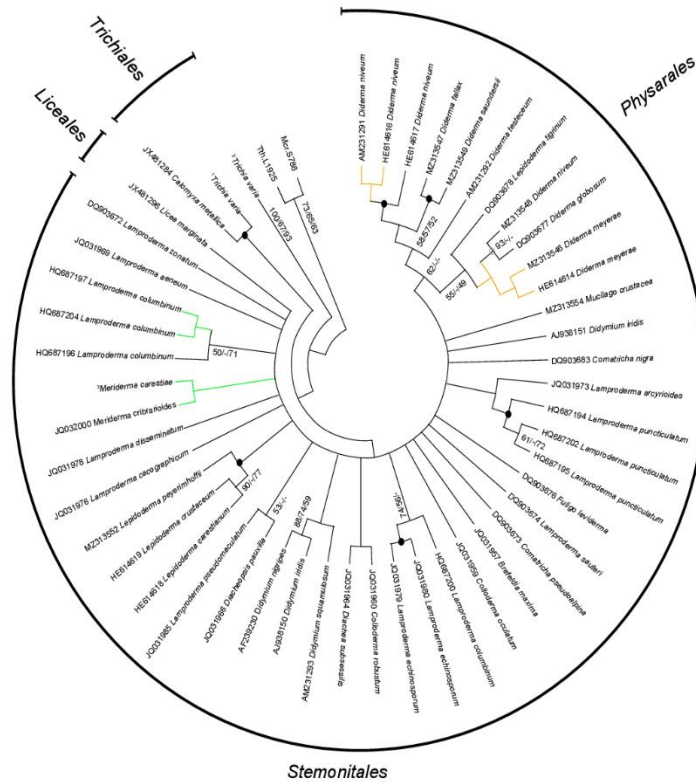

**Figure S6:** Molecular phylogeny of myxomycete S1389 group I introns. The intron topology is obtained by neighbor-joining (NJ) analysis of 74 taxa (including group introns from *Tetrahymena* (Tth.1925) and *Mucilago* (Mcr.S788), and 166 nt aligned positions (intron dataset 2; Table S1). The NJ-, maximum likelihood (ML), and maximum parsimony (MP) bootstrap replicates ( $\geq 50\%$ ) are given for each node. Bayesian posterior (BI) probabilities ( $\geq 0.95$ ) are shown in bold branches. Black dots at branch site indicate maximum support in NJ, ML, and MP ( $\geq 98\%$ ). Green line indicates maximum support in NJ, ML and MP ( $\geq 90\%$ ). Orange line indicates maximum support in NJ, ML, and MP ( $\geq 70\%$ ). Gray circles indicate alternative topologies in NJ, ML, and MP. <sup>1</sup> *Tricia varia* clade is composed of four *T. varia* isolates (KM494993-6). <sup>2</sup> *Tricia varia* clade is composed of twenty *T. varia* isolates (KM494997-9, KM495003, KM495005, KM495006, KM495009, KM495010, KM495018-30). <sup>3</sup> *Meriderma carestiae* clade is composed of two *M. carestiae* isolates (JQ031999 and DQ903671). The scale bar indicates the fraction of substitutions per site.
